## RESEARCH ARTICLE

# Effects of temperature on responses to anoxia and oxygen reperfusion in *Drosophila melanogaster*

Pablo E. Schilman<sup>1</sup>, James S. Waters<sup>2</sup>, Jon F. Harrison<sup>2</sup> and John R. B. Lighton<sup>3,4,\*</sup>

<sup>1</sup>Departamento de Biodiversidad y Biología Experimental, Facultad de Ciencias Exactas y Naturales, Universidad de Buenos Aires, C1428EHA, Buenos Aires, Argentina, <sup>2</sup>Section of Organismal, Integrative, and Systems Biology, School of Life Sciences, Arizona State University, PO Box 874501, Tempe, AZ 85287-4501, USA, <sup>3</sup>Department of Biological Sciences, University of Nevada at Las Vegas, 4505 Maryland Parkway, Las Vegas, NV 89154-4004, USA and <sup>4</sup>Sable Systems International, 6000 S. Eastern Blvd Bldg 1, Las Vegas, NV 89119, USA

\*Author for correspondence (Lighton@sablesys.com)

Accepted 20 December 2010

### SUMMARY

Insects in general, and *Drosophila* in particular, are much more capable of surviving anoxia than vertebrates, and the mechanisms involved are of considerable biomedical and ecological interest. Temperature is likely to strongly affect both the rates of damage occurring in anoxia and the recovery processes in normoxia, but as yet there is no information on the effect of this crucial variable on recovery rates from anoxia in any animal. We studied the effects of temperature, and thus indirectly of metabolic flux rates, on survival and recovery times of individual male *Drosophila melanogaster* following anoxia and O<sub>2</sub> reperfusion. Individual flies were reared at 25°C and exposed to an anoxic period of 7.5, 25, 42.5 or 60 min at 20, 25 or 30°C. Before, during and after anoxic exposure the flies' metabolic rates (MRs), rates of water loss and activity indices were recorded. Temperature strongly affected the MR of the flies, with a  $Q_{10}$  of 2.21. Temperature did not affect the slope of the relationship between time to recovery and duration of anoxic exposure, suggesting that thermal effects on damage and repair rates were similar. However, the intercept of that relationship was significantly lower (i.e. recovery was most rapid) at 25°C, which was the rearing temperature. When temperatures during exposure to anoxia and during recovery were switched, recovery times matched those predicted from a model in which the accumulation and clearance of metabolic end-products share a similar dependence on temperature.

Key words: temperature, ischemia, reperfusion damage, insect, CO<sub>2</sub> production.

### INTRODUCTION

The deleterious effects of anoxia in humans (e.g. caused by ischemia) followed by reperfusion with O<sub>2</sub>, are well known and are a key topic in biomedical studies. As a model organism *Drosophila melanogaster* has the advantage of ease of culture, a well-characterized genome, ample availability of mutants and ease of genetic manipulation, making it the principal invertebrate model animal in this field (Azad et al., 2009; Kanaan et al., 2006; Lighton and Schilman, 2007). As discussed elsewhere (Lighton and Schilman, 2007), the respiratory system of tracheate arthropods makes them ideal for monitoring the effects of changing O<sub>2</sub> concentration at the subcellular level, i.e. in the mitochondria, because their tissue partial pressure of oxygen ( $P_{O_2}$ ) can be manipulated *via* changes in air  $P_{O_2}$  even after anoxic paralysis, because such animals do not rely on a circulatory system to exchange respiratory gases. Thus, the effects of anoxia and reperfusion on their tissues are largely decoupled from the effects of these parameters on the motor effectors of their circulatory systems. In addition, insects, and invertebrates in general, are ectothermic animals. Their body temperature tracks their environmental temperature, so that the researcher can alter the metabolic rate (MR) of the intact animal simply by changing the temperature of its surroundings. These two facts make tracheate arthropods, such as insects, excellent models to study the modulatory effect, if any, of temperature, and therefore MR, on recovery from anoxia.

It has been known for years that *D. melanogaster*, like many insects, shows excellent recovery from short bouts of anoxia lasting less than 4 h (Krishnan et al., 1997). Adult flies do not encounter anoxia in the wild, so it is probable that their resistance to anoxic exposure is an exaptation derived from larval exposure to hypoxic or even anoxic conditions. Notwithstanding *Drosophila*'s impressive resistance to anoxia, Lighton and Schilman have recently demonstrated that they are damaged by repeated short bouts (60 s) of normoxia during prolonged anoxia; with CO<sub>2</sub> emission rates and spiracular control reduced with higher numbers of exposures to O<sub>2</sub> (Lighton and Schilman, 2007). This was the first evidence of physiological damage caused by O<sub>2</sub> reperfusion in any invertebrate. However, multiple (i.e. 5 or 10) 15–20 s anoxic bouts interspersed with longer duration normoxia that allowed recovery shows no negative effects on the MR of flies after recovery (Van Voorhies, 2009). Although the two studies were methodologically a little different, i.e. Lighton and Schilman used single fly, flow-through respirometry with good time resolution, as well as measuring water loss rates, whereas Van Voorhies pooled groups of ~100 flies, which may have obscured some subtle effects, we can conclude that short cycles of normoxia interspersed in prolonged anoxia is more damaging than short anoxic exposures during prolonged normoxia (Lighton and Schilman, 2007; Van Voorhies, 2009).

The duration of anoxic exposure directly and linearly affects the time required to recover from such exposure (Krishnan et al., 1997).

Presumably this occurs because longer durations of anoxia lead to greater damage, including such processes as accumulation of anaerobic end-products, loss of ion gradients and protein unfolding (Harrison and Haddad, 2011). Longer anoxic exposure may also cause mitochondrial changes that increase reactive oxygen species (ROS) production during re-exposure to O<sub>2</sub>. The processes that occur during recovery are less understood, but probably include removal of anaerobic end-products, restoration of ion and water gradients, and repair and/or restoration of protein function (Harrison and Haddad, 2011).

Temperature is a ubiquitous environmental variable for ectotherms, affecting virtually every aspect of metabolic function. Thermal effects on recovery time from anoxic exposure are likely to depend on the relative temperature sensitivity of damage rates during anoxia and repair rates during subsequent re-exposure to normoxia. Higher body temperatures will increase metabolic rates of ectotherms, probably leading to increased production rates of anaerobic end-products and ROS during re-exposure to O<sub>2</sub>. Higher metabolic rates will increase the rate of formation of anaerobic end-products: lactate, alanine and acetate in *Drosophila* (Feala et al., 2007). Higher temperatures probably also increase ion leakages that disrupt membrane electrical function. During recovery, higher temperatures would be expected to increase the activity of ion pumps restoring membrane ion gradients, catabolic ATP production and enzymatic repair. Increased temperature will also increase MR, probably increasing the rate of reperfusion damage.

The prediction, which to our knowledge has never been experimentally tested, is that if the thermal sensitivity of damage and recovery process are similar, then the recovery time at any given anoxic duration will be independent of temperature and thus indirectly of MR. Alternatively, correlations between temperature and recovery time could point to specific key processes. For example, anoxic damage could be primarily due to ROS production during re-exposure to O<sub>2</sub>, with ROS production increasing exponentially with MR. In this case the slope of the regression line relating the duration of anoxic exposure to recovery time should increase as MR is increased. Another possibility is that recovery time may be primarily limited by the rates of recovery processes such as ion pumping and protein repair; if this is the case then recovery time from a given anoxic exposure should decrease at higher temperatures.

Another factor that may influence the effect of temperature on recovery times from anoxia is thermal adaptation or acclimation. There is abundant evidence that ectotherms, including *Drosophila*, demonstrate both acclimatory and adaptive responses that enhance performance at the habitat temperature (Gibbs et al., 1998; Overgaard et al., 2008). Such compensatory alteration of structure could result in the shortest recovery times occurring at the rearing temperature for these flies.

## MATERIALS AND METHODS

### Animals

Male *Drosophila melanogaster* Meigen, between 4 and 10 days of age were used in the experiments. All flies were of the Canton-S strain, reared at 25°C at the University of Nevada at Las Vegas, NV, USA, and kept at Sable Systems International (SSI, Las Vegas, NV, USA) at the ambient light:dark cycle at a controlled temperature of 25±0.2°C.

### Respirometry

Flow-through respirometry with automated switching between anoxia and normoxia was performed as described by Lighton and

Schilman (Lighton and Schilman, 2007). Briefly, we used a Sable Systems International SI-1 CO<sub>2</sub>-based flow-through respirometry system, capable of measuring the CO<sub>2</sub> and water vapor output of individual flies in real time at a mass flow rate of 50 ml min<sup>-1</sup>. The respirometry chamber (interior volume <1 ml) was constructed of metal, with sapphire windows at each end to allow photoelectric detection of activity while maximizing thermal homogeneity (Drosophilator; SSI). The fly was therefore surrounded by a highly thermally conductive environment. Air entering the chamber for flow-through respirometry was first equilibrated to the chamber's temperature by traveling through a serpentine path milled into the upper metal surface of the metal block from which the chamber was machined. The chamber was in tight thermal contact with a temperature-controlled plate (PELT-5; SSI), which controlled the chamber's temperature with a precision of ±0.1°C (Fig. 1). The input gas stream for the system could be switched between ambient air scrubbed of CO<sub>2</sub> and pure N<sub>2</sub>. Any residual leakage of CO<sub>2</sub> into the inactive side of the solenoid valve was eliminated by a small downstream CO<sub>2</sub> scrubber. We experimentally verified that switching between gas streams took place without affecting the CO<sub>2</sub> readings. Essentially complete transition between normoxia and anoxia took place in <30 s. Switching of the incurrent airstream and periodic baselining of the system took place automatically under the control of the data acquisition system (ExpeData, SSI). Data were sampled at 1 Hz, using intra-sample finite impulse response digital filtration to reduce analyzer noise (Lighton, 2008).

### Experimental procedure

In the first series of experiments, an individual male *Drosophila* was directly aspirated from its container and placed in the chamber. The recording began with a 3 min baseline segment to establish the zero points for the CO<sub>2</sub> and water vapor analyzers. After that, the CO<sub>2</sub> and H<sub>2</sub>O released by the fly were measured for 24 min (plus another baseline after 12 or 17 min). The incurrent air was changed to pure N<sub>2</sub> for 7.5, 25, 42.5 or 60 min. After anoxia exposure, measurement continued for another 30–60 min (depending on the anoxia duration), and at the end another 3 min baseline was taken. The same procedure was repeated at 20, 25 and 30°C. When the

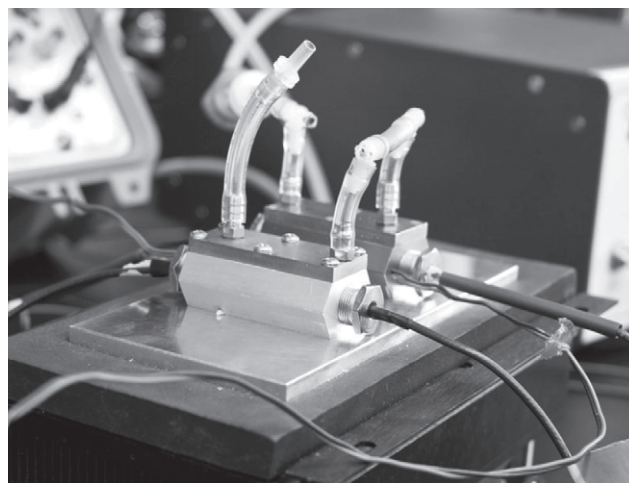

Fig. 1. Metal respirometry chambers (volume <1 ml) with sapphire windows at each end to allow photoelectric detection of activity used in all experiments. The chamber was in tight thermal contact with a temperature-controlled plate. Air entering the chamber was equilibrated to the chamber's temperature by traveling through a serpentine path milled into the upper metal surface of the metal block.

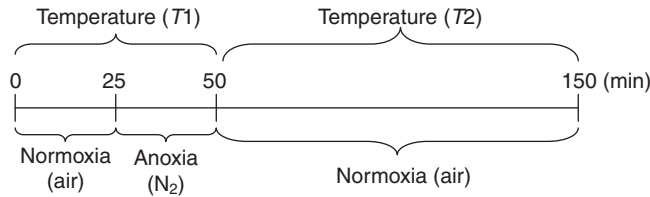

Fig. 2. Schema showing the protocol used in the second series of experiments. Time is in minutes. Temperature in the first 50 min (T1) was fixed at 20 or 30°C. For the first 25 min, flies were exposed to normoxic conditions. For the next 25 min flies were exposed to an anoxic atmosphere (pure nitrogen). Temperature in the last 100 min (T2) was also fixed at 20 or 30°C. T2 was the period allowed for recovery in normoxic conditions. Treatments were performed at 20/20; 20/30 and 30/20°C (T1/T2, respectively).

recording was complete, the fly was immobilized with N<sub>2</sub>, removed from the chamber and weighed to the nearest 1 µg using a Cahn C-32 ultramicrobalance (Cahn Instruments Inc., Cerritos, CA, USA). The mass of water lost during the recording, as determined from the respirometry data, was added to its post-recording mass (Lighton et al., 2004).

In order to uncouple the effect of temperature, and thus MR, on metabolic end-product production and clearance, a second series of experiments was performed. In this series, only the activity was monitored because it has been established that no significant differences exist between critical P<sub>O<sub>2</sub></sub> values calculated from activity-based and CO<sub>2</sub> production-based methods (Klok et al., 2010). The second series of experiments consisted of two periods with temperatures T1 and T2. T1 lasted for 50 min. During half of that time, i.e. 25 min, the flies were exposed to normoxic conditions, and during the other 25 min flies were exposed to an anoxic atmosphere. T2 lasted for the 100 min of the recovery period in normoxic conditions at temperature 2 (see schema in Fig. 2). T1 and T2 were fixed at 20 or 30°C giving, as a result, the following treatments: 20/20, 20/30 and 30/20°C (T1/T2, respectively).

Resumption of activity after anoxic exposure was clearly evident in the photoelectric activity record, and was objectively quantified using the absolute difference sum breakpoint method (Lighton and Turner, 2004). Recovery times were measured, analyzed and compared across groups.

**Statistics**

CO<sub>2</sub> and water vapor signals were converted and expressed in µl h<sup>-1</sup> and µg h<sup>-1</sup>, respectively [for a complete set of equations see Lighton (Lighton, 2008)]. Values are means ± standard errors (s.e.m.) and the sample sizes (N) are given. Regressions were computed by the least squares method, with significance testing by ANOVA. Regressions were compared using analysis of covariance (ANCOVA) using the RudeStat statistical package within ExpeData. For the second experimental series, the effect of temperature, i.e. MR, on the proportion of recovered flies during the assay time (i.e.

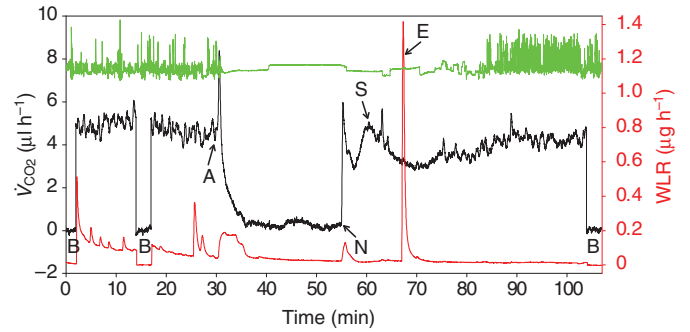

Fig. 3. Typical traces of a 25 min anoxia exposure at 25°C (single male fly, mass 0.793 mg). Black trace: rate of CO<sub>2</sub> emission (V<sub>CO<sub>2</sub></sub>); red trace: rate of water loss (WLR); green trace: activity (arbitrary units). A, initiation of anoxia; B, baseline (respirometer chamber switched out of circuit under program control); E, excretion event (which demonstrates the rapid response time for the water vapor signal); N, re-initiation of normoxia; S, secondary peak of CO<sub>2</sub> output.

100 min) was tested using the χ<sup>2</sup>-test of independence, and the effect of temperature on recovery times was tested using one-way ANOVA and a posteriori Tukey’s tests (Zar, 1984); these tests were carried out within InStat (GraphPad Software, Inc., San Diego, CA, USA).

**RESULTS**

The mean body mass of the flies was 0.878±0.006 mg (N=101). Basic statistics can be found in Table 1. In the first series of experiments to assay the effects of body mass and temperature on the V<sub>CO<sub>2</sub></sub> of the flies, we performed a multiple regression analysis of log-transformed V<sub>CO<sub>2</sub></sub> against log-transformed body mass and measurement temperature. As expected, given the limited variance of body mass, no significant effect of body mass on V<sub>CO<sub>2</sub></sub> was found (t<sub>98</sub>=0.13, P>0.4). Thus, we expressed V<sub>CO<sub>2</sub></sub> on a whole-animal rather than a mass-specific basis. Expressed as the relationship between log-transformed V<sub>CO<sub>2</sub></sub> and temperature, the effect of temperature on V<sub>CO<sub>2</sub></sub> was profound (t<sub>98</sub>=10.77, P<10<sup>-6</sup>), with a slope of 0.0343, corresponding to a Q<sub>10</sub> of 10<sup>0.343</sup> or 2.21 (overall significance: F<sub>2,98</sub>=59.77, P<10<sup>-6</sup>).

The effects of anoxic exposure were similar to those previously reported for *D. melanogaster* strain Oregon-R at 25°C (Lighton and Schilman, 2007). Fig. 3 shows a typical example. Briefly, a short peak of CO<sub>2</sub> emission occurred at the onset of anoxia, followed by a rapid decline to values close to the system baseline of zero CO<sub>2</sub>. Following resumption of normoxia, mitochondrial CO<sub>2</sub> production resumed and recovery, as assayed by resumption of voluntary motor activity, resumed in due course.

Our primary aim was to assess the effects of changing MR on the relationship between the duration of anoxic exposure and the time taken for recovery, i.e. restoration of voluntary motor activity. The slope of this line was not affected by measurement temperature and thus was unaffected by MR (Fig. 4). The common, dimensionless slope was 0.583±0.028.

Table 1. Rate of CO<sub>2</sub> emission and water loss of male *Drosophila melanogaster* at 20, 25 and 30°C

| Temperature (°C) | V <sub>CO<sub>2</sub></sub> (µl h <sup>-1</sup> ) | PV <sub>CO<sub>2</sub></sub> (µl h <sup>-1</sup> ) | WLR (µg h <sup>-1</sup> ) | N  |
|------------------|---------------------------------------------------|----------------------------------------------------|---------------------------|----|
| 20               | 2.58±0.14                                         | 4.59±0.15                                          | 0.066±0.007               | 34 |
| 25               | 3.73±0.20                                         | 6.61±0.21                                          | 0.078±0.009               | 31 |
| 30               | 5.47±0.16                                         | 8.72±0.23                                          | 0.124±0.016               | 36 |

V<sub>CO<sub>2</sub></sub>, rate of CO<sub>2</sub> emission per fly; PV<sub>CO<sub>2</sub></sub>, peak rate of CO<sub>2</sub> emission per fly at the start of anoxia exposure; WLR, rate of water loss per fly; N, sample size.

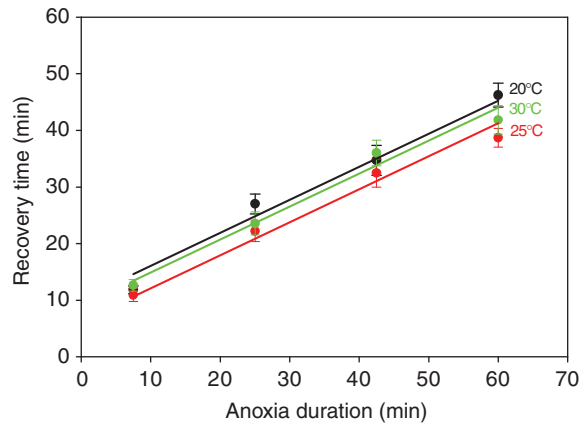

Fig. 4. The relationship between anoxia exposure duration and recovery time (the point at which the photoelectric activity recording revealed that voluntary activity had resumed) at 20, 25 and 30°C (black, red and green traces, respectively). Temperature, and thus metabolic rate, had no significant effect on the slope of recovery time vs duration of anoxic exposure (ANCOVA:  $F_{2,81}=1.12$ ,  $P=0.3$ ). Slopes measured at 20, 25 and 30°C shared a common dimensionless value of  $0.583\pm 0.028$ . However, intercepts differed significantly across temperatures, being significantly lower at the raising temperature of 25°C than at either 20 or 30°C ( $F_{2,83}=4.69$ ,  $P=0.01$ ).

Temperature significantly affected the intercept of the regression relating recovery time to anoxia duration (Fig. 4). The intercept at 25°C, the rearing temperature, was lowest ( $6.29\pm 8.41$  min, adjusted mean 25.50), vs 20°C ( $10.24\pm 8.70$  min, adjusted mean 29.45) and 30°C ( $9.06\pm 9.00$  min, adjusted mean 28.29). The intercepts at 20 and 30°C did not differ significantly ( $F_{1,53}=0.56$ ,  $P=0.4$ ). The intercept at 20°C was significantly greater than at 25°C ( $F_{1,57}=8.72$ ,  $P=0.004$ ). The intercept at 30°C was also significantly greater than at 25°C ( $F_{1,55}=4.07$ ,  $P<0.05$ ).

In the second series of experiments we changed the temperature between the anoxic and recovery periods of the experiment while holding the anoxia duration constant at 25 min. From a total of 40 flies, 33 recordings were analyzed. One fly was discarded because it was a female, another because it was dead at the end of the experiment and the other five because they showed no activity during the pre-anoxic phase (first 25 min).

The statistical analysis revealed highly significant differences across treatments in the proportion of flies that recovered before

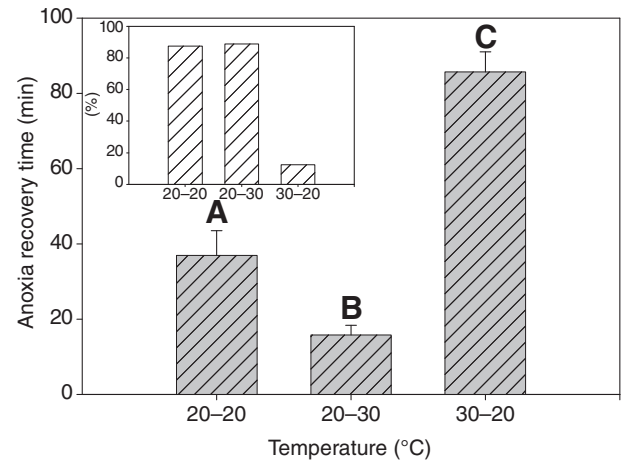

Fig. 5. Mean  $\pm$  s.e.m. of Anoxia recovery times (the point at which the photoelectric activity recording revealed that voluntary activity had resumed) in minutes as a function of the temperature treatment (°C), which modulated the metabolic rates of the flies. Treatments were: anoxia at 20°C and recovery in normoxia at the same temperature (20/20; left bar) or at 30°C (20/30; middle bar) and anoxia at 30°C and recovery at 20°C (30/20; right bar; see Materials and methods for detailed explanation). Values are means  $\pm$  s.e.m. Letters indicate significant differences between treatments – a, b:  $P<0.05$ ; a, c and b, c:  $P<0.001$  (*a posteriori* Tukey's test). Inset: percentages of insects that recovered in less than 100 min. Significant differences were found ( $\chi^2$ -test of independence:  $\chi^2_2=18.932$ ,  $P<0.0001$ ).

the assay ended ( $\chi^2$ -test of independence:  $\chi^2_2=18.932$ ,  $P<0.0001$ ; Fig. 5 inset). The *a posteriori* comparison revealed a significantly smaller recovery for flies exposed to anoxia at 30°C and then allowed to recover at 20°C (only 2 out of 16, i.e. 12.5%), whereas no significant differences were found between treatments 20/20 (seven out of eight; i.e. 87.5%) and 20/30 (eight out of nine; i.e. 88.89%;  $\chi^2$ -test of independence:  $\chi^2_1=0.008$ ,  $P<0.9293$ ; Fig. 5 inset). Temperature, and thus MR, significantly affected recovery times ( $F_{2,14}=24.527$ ,  $P>0.0001$ ; one-way ANOVA; Fig. 5, Table 2). An *a posteriori* Tukey's test indicated significant differences across all treatments: 20/20 vs 20/30,  $q=4.515$ ,  $P<0.05$ ; 20/20 vs 30/20,  $q=6.723$ ,  $P<0.001$  and 20/30 vs 30/20,  $q=9.774$ ,  $P<0.001$  (Fig. 5). Recovery times from the first and second series of experiments in flies exposed to 25 min of anoxia at 20°C were not significantly different ( $t_{12}=1.446$ ,  $P=0.174$ ; unpaired *t*-test).

Table 2. Effects of ambient temperature on recovery time and survival of *Drosophila melanogaster* for four different anoxia exposure durations

| Temperature (°C) | Anoxia duration (min) | Recovery time (min) | Survival    |
|------------------|-----------------------|---------------------|-------------|
| 20               | 7.5                   | 11.84 $\pm$ 0.70    | 7/8 (87.5%) |
| 20               | 25                    | 27.00 $\pm$ 1.75    | 7/8 (87.5%) |
| 20               | 42.5                  | 34.72 $\pm$ 2.64    | 7/8 (87.5%) |
| 20               | 60                    | 46.22 $\pm$ 2.09    | 8/10 (80%)  |
| 25               | 7.5                   | 10.92 $\pm$ 1.12    | 8/8 (100%)  |
| 25               | 25                    | 22.21 $\pm$ 1.84    | 8/8 (100%)  |
| 25               | 42.5                  | 32.45 $\pm$ 2.45    | 7/7 (100%)  |
| 25               | 60                    | 38.69 $\pm$ 1.65    | 8/8 (100%)  |
| 30               | 7.5                   | 12.63 $\pm$ 1.00    | 8/8 (100%)  |
| 30               | 25                    | 23.55 $\pm$ 2.04    | 7/8 (87.5%) |
| 30               | 42.5                  | 35.99 $\pm$ 2.27    | 8/8 (100%)  |
| 30               | 60                    | 41.84 $\pm$ 2.52    | 4/12 (33%)  |

All flies were male and reared at 25°C.



## DISCUSSION

The response of CO<sub>2</sub> emission and water loss rates during and after anoxia are complex. As previously observed, changes in the composition of the atmospheric air modulate the spiracular opening in insects, with anoxia promoting increased water loss, indicating increased spiracular opening (red trace in Fig. 3) (Lighton and Schilman, 2007; Lighton et al., 2004; Schilman et al., 2005). During anoxia, activity ceases within seconds, with full recovery of motion taking many minutes (green trace in Fig. 3). Both CO<sub>2</sub> and water emission rates spike after re-exposure to normoxia, with a secondary peak of CO<sub>2</sub> occurring a few minutes after normoxia resumes, which may be related to the repair of O<sub>2</sub> reperfusion damage (Fig. 3) (Lighton and Schilman, 2007). This post-anoxic increase of MR above normoxic values, or 'overshoot', has been observed in different species and it might be a consequence of a rapid compensation for the detrimental consequences of anoxia (Makarieva et al., 2006).

As expected from an ectothermic animal, the MR of *D. melanogaster* was strongly influenced by measurement temperature (Table 1 and Fig. 4); estimated  $Q_{10}$  was 2.21, which is within the range of 1.79 to 2.5 found for measurements made at 18 and 25°C (Berrigan and Partridge, 1997). Breeding temperature also has an effect on metabolism; flies evolving in the laboratory for more than 100 generations at 18°C have 5–7% higher mass-specific MRs at 25°C than flies evolving at 25°C (Berrigan and Partridge, 1997). Rearing flies at low atmospheric P<sub>O<sub>2</sub></sub> (10 kPa; i.e. hypoxia) can limit their size (Klok and Harrison, 2009). However, the critical P<sub>O<sub>2</sub></sub> values, the CO<sub>2</sub> emission rates and the maximal tracheal conductance values were independent of the rearing P<sub>O<sub>2</sub></sub> (Klok et al., 2010). Also, rearing temperature and O<sub>2</sub> have interactive effects on size, eclosion times, growth rates and survival during the development of *D. melanogaster* (Frazier et al., 2001). In addition, total energy requirements during metamorphosis are dependent on temperature. Both low (18°C) and high temperatures (29°C) increase metabolic expenditure, with the optimal temperature for metamorphosis being 25°C (Merkey et al., 2008).

Temperature, and the correlated changes in MR, did not affect the slope of the regression line relating anoxic exposure duration to recovery time (Fig. 4). The thermal independence of the slope of this regression (Fig. 4) suggests that rates of anoxic damage and normoxic repair are equivalently sensitive to temperature and thus likely to affect metabolic flux rates. Flies recovered faster from anoxia and were less affected by O<sub>2</sub> reperfusion damage at the temperature at which they developed (Fig. 4). This suggests that the kinetics and pathway capacities of their enzymatic machinery are optimized to that temperature, perhaps as a result of adaptation or beneficial acclimation. These results are consistent with previous studies showing that optimal performance tends to occur at the intermediate developmental temperature of 25°C in *D. melanogaster* (Crill et al., 1996; Gibert et al., 2001).

Our second series of experiments, where we switched temperatures between exposure to anoxia and recovery time, clearly demonstrate that temperature strongly affects both recovery and damage rates, and suggests that both these processes are proportional to metabolic rates. As noted above, the estimated  $Q_{10}$  of the flies was ~2, i.e. metabolic rates of flies kept at 20°C were approximately half of those kept at 30°C (Table 1). Similarly, the recovery times for flies recovering from anoxia at 30°C were approximately half of the recovery times at 20°C (Fig. 5). These results suggest that higher temperatures directly accelerate enzymatic processes such as clearance of metabolic end-products, repair of damaged proteins and restoration of ion gradients. Damage rates also appear to be proportional to temperature/metabolic rates, as recovery times were approximately twice as long if anoxia

occurred at 30°C and recovery occurred at 20°C (Fig. 5). These results suggest that anoxic damage is at least partly related to processes associated with metabolism such as production of ROS, accumulation of anaerobic end-products, etc. Flies that experienced anoxia at 30°C, followed by recovery at 20°C were the only group in which recovery was strongly impacted, i.e. most of the flies did not recover in the 100 min of normoxia after the anoxic period (Fig. 5 inset), further supporting the importance of temperature/metabolic rates on damage and recovery processes.

## ACKNOWLEDGEMENTS

We thank Sable Systems International (SSI), which funded this research as part of its Basic Research Initiative, for use of equipment and facilities. We also thank the editor and two anonymous reviewers for useful comments on the manuscript. This research was also partially supported by NSF EAR 0746352 to J.F.H. P.E.S. thanks DAAD (Germany), CONICET and ANPCyT/Argentina (PICT2008-0268 and PICT2008-0035) for past and present financial support.

## REFERENCES

- Azad, P., Zhou, D., Russo, E. and Haddad, G. G. (2009). Distinct mechanisms underlying tolerance to intermittent and constant hypoxia in *Drosophila melanogaster*. *PLoS One* **4**, e5371.
- Berrigan, D. and Partridge, L. (1997). Influence of temperature and activity on the metabolic rate of adult *Drosophila melanogaster*. *Comp. Biochem. Physiol.* **118A**, 1301-1307.
- Crill, W. D., Huey, R. B. and Gilchrist, G. W. (1996). Within- and between-generation effects of temperature on the morphology and physiology of *Drosophila melanogaster*. *Evolution* **50**, 1205-1218.
- Feala, J. D., Coquin, L., McCulloch, A. D. and Paternostro, G. (2007). Flexibility in energy metabolism supports hypoxia tolerance in *Drosophila* flight muscle: metabolic and computational systems analysis. *Mol. Syst. Biol.* **3**, 99.
- Frazier, M. R., Woods, H. A. and Harrison, J. F. (2001). Interactive effects of rearing temperature and oxygen on the development of *Drosophila melanogaster*. *Physiol. Biochem. Zool.* **74**, 641-650.
- Gibbs, A. G., Louie, A. K. and Ayala, J. A. (1998). Effects of temperature on cuticular lipids and water balance in a desert *Drosophila*: is thermal acclimation beneficial? *J. Exp. Biol.* **201**, 71-80.
- Gibert, P., Huey, R. B. and Gilchrist, G. W. (2001). Locomotor performance of *Drosophila melanogaster*: interactions among developmental and adult temperatures, age and geography. *Evolution* **55**, 205-209.
- Harrison, J. F. and Haddad, G. G. (2011). Effects of oxygen on growth and size: synthesis of molecular, organismal and evolutionary studies with *Drosophila melanogaster*. *Annu. Rev. Physiol.* **73**, 13.1-13.9.
- Kanaan, A., Farahani, R., Douglas, R. M., Lamanna, J. C. and Haddad, G. G. (2006). Effect of chronic continuous or intermittent hypoxia and reoxygenation on cerebral capillary density and myelination. *Am. J. Physiol. Regul. Integr. Comp. Physiol.* **290**, R1105-R1114.
- Klok, C. J. and Harrison, J. F. (2009). Atmospheric hypoxia limits selection for large body size in insects. *PLoS One* **4**, e3876.
- Klok, C. J., Kaiser, A., Lighton, J. R. B. and Harrison, J. F. (2010). Critical oxygen partial pressures and maximal tracheal conductances for *Drosophila melanogaster* reared for multiple generations in hypoxia or hyperoxia. *J. Insect Physiol.* **56**, 461-469.
- Krishnan, S. N., Sun, Y. A., Mohsenin, A., Wyman, R. J. and Haddad, G. G. (1997). Behavioral and electrophysiological responses of *Drosophila melanogaster* to prolonged periods of anoxia. *J. Insect Physiol.* **43**, 203-210.
- Lighton, J. R. B. (2008). *Measuring Metabolic Rates: A Manual for Scientists*. Oxford: Oxford University Press.
- Lighton, J. R. B. and Schilman, P. E. (2007). Oxygen reperfusion damage in an insect. *PLoS One* **2**, e1267.
- Lighton, J. R. B. and Turner, R. J. (2004). Thermolimit respirometry: an objective assessment of critical thermal maxima in two sympatric desert harvester ants, *Pogonomyrmex rugosus* and *P. californicus*. *J. Exp. Biol.* **207**, 1903-1913.
- Lighton, J. R. B., Schilman, P. E. and Holway, D. A. (2004). The hyperoxic switch: assessing respiratory water loss rates in tracheate arthropods with continuous gas exchange. *J. Exp. Biol.* **207**, 4463-4471.
- Makarieva, A. M., Gorshkov, V. G., Li, B.-L. and Chown, S. L. (2006). Size- and temperature-independence of minimum life-supporting metabolic rates. *Funct. Ecol.* **20**, 83-96.
- Merkey, A. B., Gibbs, A. G. and Hoshizaki, D. K. (2008). *The U-Shaped Metabolic Curve of Insect Metamorphosis: Substrate Utilization Patterns and Proximate Causes*. San Diego: 49th Annual Drosophila Research Conference.
- Overgaard, J., Tomcala, A., Sørensen, J. C., Holmstrup, M., Krogh, P. H., Simek, P. and Kostál, V. (2008). Effects of acclimation temperature on thermal tolerance and membrane phospholipid composition in the fruit fly *Drosophila melanogaster*. *J. Insect Physiol.* **54**, 619-629.
- Schilman, P. E., Lighton, J. R. B. and Holway, D. A. (2005). Respiratory and cuticular water loss in insects with continuous gas exchange: comparison across five ant species. *J. Insect Physiol.* **51**, 1295-1305.
- Van Voorhies, W. A. (2009). Metabolic function in *Drosophila melanogaster* in response to hypoxia and pure oxygen. *J. Exp. Biol.* **212**, 3132-3141.
- Zar, J. H. (1984). *Biostatistical Analysis*, 2nd edn. London: Prentice-Hall International Editions.
